# Supplementary material for: Quantitative Analysis of Polysaccharide Composition in Polyporus umbellatus by HPLC–ESI–TOF–MS
Source: PubMed Central journal article supplement (PMC6681038; doi:10.3390/molecules24142526), 2019-07-10
Supplement: molecules-24-02526-s001.pdf [file molecules-24-02526-s001.pdf]

## Supporting information

# Quantitative analysis of polysaccharide composition in *Polyporus umbellatus* by HPLC-ESI-TOF-MS

Ning Guo <sup>1</sup>, Zongli Bai <sup>2</sup>, Zongtao Lin <sup>3</sup>, Weijuan Jia <sup>1</sup>, Jianhua Sun <sup>2</sup>, WanWan Wang <sup>1</sup>, JingJing Dong <sup>2</sup>, Shizhong Chen <sup>1,\*</sup> and Hong Wang <sup>1,\*</sup>

<sup>1</sup> School of Pharmaceutical Sciences, Peking University, Beijing 100191, China; Guoning19900906@163.com (N.G.); JiaweiJuan517@163.com (W.J.); 1450373611@qq.com (W.W.)

<sup>2</sup> Kangmei Pharmaceutical Co.Ltd, Puning 515300, China; 3050471@qq.com (Z.B.); lyhwkj@126.com (J.S.); 18811331279@163.com (J.D.)

<sup>3</sup> Department of Pharmaceutical Sciences, University of Tennessee Health Science Center, Memphis, TN 38163, United States; zongtao@sas.upenn.edu (Z.L.)

\* Correspondence: hw9505@bjmu.edu.cn (H.W.); chenshizhong66@163.com (S. C.)

**Table S1.** Factors and levels of the orthogonal L<sub>9</sub> (3)<sup>4</sup> experiments.

| <b>Factor</b>                 | <b>level</b> |          |          |
|-------------------------------|--------------|----------|----------|
|                               | <b>1</b>     | <b>2</b> | <b>3</b> |
| A Hydrolysis time (h)         | 3            | 6        | 9        |
| B hydrolysis temperature (°C) | 100          | 110      | 120      |
| C concentration of TFA (M)    | 2            | 3        | 4        |

**Table S2.** The orthogonal experiment results of glucose released from PPS.

| No.            | A (h)     | B (°C)    | C (M)    | D <sup>2</sup> | Peak area<br>(mAu × min) |
|----------------|-----------|-----------|----------|----------------|--------------------------|
| 1              | 1         | 1         | 1        | 1              | 19832553                 |
| 2              | 1         | 2         | 2        | 2              | 19418943                 |
| 3              | 1         | 3         | 3        | 3              | 23857274                 |
| 4              | 2         | 1         | 2        | 3              | 21008328                 |
| 5              | 2         | 2         | 3        | 1              | 25607274                 |
| 6              | 2         | 3         | 1        | 2              | 26377491                 |
| 7              | 3         | 1         | 3        | 2              | 23530119                 |
| 8              | 3         | 2         | 1        | 3              | 24444606                 |
| 9              | 3         | 3         | 2        | 1              | 23069984                 |
| K <sub>1</sub> | 21036257  | 21457000  | 23551550 | 22836604       |                          |
| K <sub>2</sub> | 24331031  | 23156941  | 21165752 | 23108851       |                          |
| K <sub>3</sub> | 23681570  | 24434916  | 24331556 | 23103403       |                          |
| R <sup>1</sup> | 3294774.3 | 2977916.3 | 3165804  | 272247.33      |                          |

1 R refers to the result of extreme analysis

2 D refers to the error column used to the variance analysis.

**Table S3.** The orthogonal experiment results of glucosamine released from PPS.

| No.            | A (h)    | B (°C)    | C (M)     | D <sup>2</sup> | Peak area<br>(mAu × min) |
|----------------|----------|-----------|-----------|----------------|--------------------------|
| 1              | 1        | 1         | 1         | 1              | 310528                   |
| 2              | 1        | 2         | 2         | 2              | 238940                   |
| 3              | 1        | 3         | 3         | 3              | 162996                   |
| 4              | 2        | 1         | 2         | 3              | 305686                   |
| 5              | 2        | 2         | 3         | 1              | 192207                   |
| 6              | 2        | 3         | 1         | 2              | 169919                   |
| 7              | 3        | 1         | 3         | 2              | 283933                   |
| 8              | 3        | 2         | 1         | 3              | 169849                   |
| 9              | 3        | 3         | 2         | 1              | 176813                   |
| K <sub>1</sub> | 237488   | 300049    | 216765.33 | 226516         |                          |
| K <sub>2</sub> | 222604   | 200332    | 240479.67 | 230930.67      |                          |
| K <sub>3</sub> | 210198.3 | 169909.33 | 213045.33 | 212843.67      |                          |
| R <sup>1</sup> | 27289.67 | 130139.67 | 27434.33  | 18087          |                          |

1 R refers to the result of extreme analysis

2 D refers to the error column used to the variance analysis.

**Table S4.** The orthogonal experiment results of glucuronic acid released from PPS.

| No.            | A (h)   | B (°C)     | C (M)      | D <sup>2</sup> | Peak area<br>(mAu × min) |
|----------------|---------|------------|------------|----------------|--------------------------|
| 1              | 1       | 1          | 1          | 1              | 640585                   |
| 2              | 1       | 2          | 2          | 2              | 548991                   |
| 3              | 1       | 3          | 3          | 3              | 1108463                  |
| 4              | 2       | 1          | 2          | 3              | 708610                   |
| 5              | 2       | 2          | 3          | 1              | 1225162                  |
| 6              | 2       | 3          | 1          | 2              | 1235617                  |
| 7              | 3       | 1          | 3          | 2              | 831719                   |
| 8              | 3       | 2          | 1          | 3              | 1177904                  |
| 9              | 3       | 3          | 2          | 1              | 688376                   |
| K <sub>1</sub> | 766013  | 726971.33  | 1018035.33 | 851374.33      |                          |
| K <sub>2</sub> | 1056463 | 984019     | 648659     | 872109         |                          |
| K <sub>3</sub> | 899333  | 1010818.67 | 1055114.67 | 998325.67      |                          |
| R <sup>1</sup> | 290450  | 283847.33  | 406455.67  | 146951.33      |                          |

1 R refers to the result of extreme analysis

2 D refers to the error column used to the variance analysis.

**Table S5.** Variance analysis results of glucose released from PPS.

| <b>Variation sources</b> | <b>Quadratic sum</b> | <b>Degree of freedom</b> | <b>Mean square</b> | <b>F<sup>4</sup></b> | <b>P<sup>5</sup></b> |
|--------------------------|----------------------|--------------------------|--------------------|----------------------|----------------------|
| A <sup>1</sup>           | 1.8275E+13           | 2                        | 9.1375E+12         | 125.748              | < 0.05               |
| B <sup>2</sup>           | 1.3391E+13           | 2                        | 6.6955E+12         | 92.142               | < 0.05               |
| C <sup>3</sup>           | 1.6323E+13           | 2                        | 8.1614E+12         | 112.315              | < 0.05               |
| D (Error)                | 1.4533E+11           | 2                        | 7.2665E+10         | 1                    |                      |

$F_{0.05}(2, 2) = 19.00$

<sup>1</sup>A is the hydrolysis temperature.

<sup>2</sup>B is the sulfuric acid concentration.

<sup>3</sup>C is the hydrolysis time.

<sup>4</sup>F is the critical value.

<sup>5</sup>P is the probability value.

**Table S6.** Variance analysis results of glucosamine released from PPS.

| Variation sources | Quadratic sum | Degree of freedom | Mean square | F <sup>4</sup> | P <sup>5</sup> |
|-------------------|---------------|-------------------|-------------|----------------|----------------|
| A <sup>1</sup>    | 1.1202E+9     | 2                 | 5.6008E+8   | 2.099          | >0.05          |
| B <sup>2</sup>    | 2.7805E+10    | 2                 | 1.3902E+10  | 52.113         | < 0.05         |
| C <sup>3</sup>    | 1.3289E+9     | 2                 | 6.6443E+8   | 2.491          | > 0.05         |
| D (Error)         | 5.3356E+8     | 2                 | 2.6678E+8   | 1              |                |

$$F_{0.05}(2, 2) = 19.00$$

<sup>1</sup>A is the hydrolysis temperature.

<sup>2</sup>B is the sulfuric acid concentration.

<sup>3</sup>C is the hydrolysis time.

<sup>4</sup>F is the critical value.

<sup>5</sup>P is the probability value.

**Table S7.** Variance analysis results of glucuronic acid released from PPS.

| <b>Variation sources</b> | <b>Quadratic sum</b> | <b>Degree of freedom</b> | <b>Mean square</b> | <b>F<sup>4</sup></b> | <b>P<sup>5</sup></b> |
|--------------------------|----------------------|--------------------------|--------------------|----------------------|----------------------|
| A <sup>1</sup>           | 1.2683E+11           | 2                        | 6.3413E+10         | 3.341                | >0.05                |
| B <sup>2</sup>           | 1.4736E+11           | 2                        | 7.3681E+10         | 3.382                | > 0.05               |
| C <sup>3</sup>           | 3.0302E+11           | 2                        | 1.5151E+11         | 7.984                | > 0.05               |
| D (Error)                | 3.7955E+10           | 2                        | 1.8978E+10         | 1                    |                      |

$F_{0.05}(2, 2) = 19.00$

<sup>1</sup> A is the hydrolysis temperature.

<sup>2</sup> B is the sulfuric acid concentration.

<sup>3</sup> C is the hydrolysis time.

<sup>4</sup> F is the critical value.

<sup>5</sup> P is the probability value.
